# Supplementary material
Source: publisher figshare collection journal article supplement (https://frontiersin.figshare.com/ndownloader/files/22089156)
Supplement: Supplementary file [file 22089156]

## *Supplementary Material*

**Global jitter motion of the retinal image dynamically alters the receptive field properties of retinal ganglion cells.**

Akihiro Matsumoto, Masao Tachibana

### **1 Supplementary Figures and Tables**

Supplementary Figure 1, Related to Figure 1 and 2.

Supplementary Figure 2, Related to Figure 2.

Supplementary Figure 3, Related to Figure 3.

## 1.1 Supplementary Figures

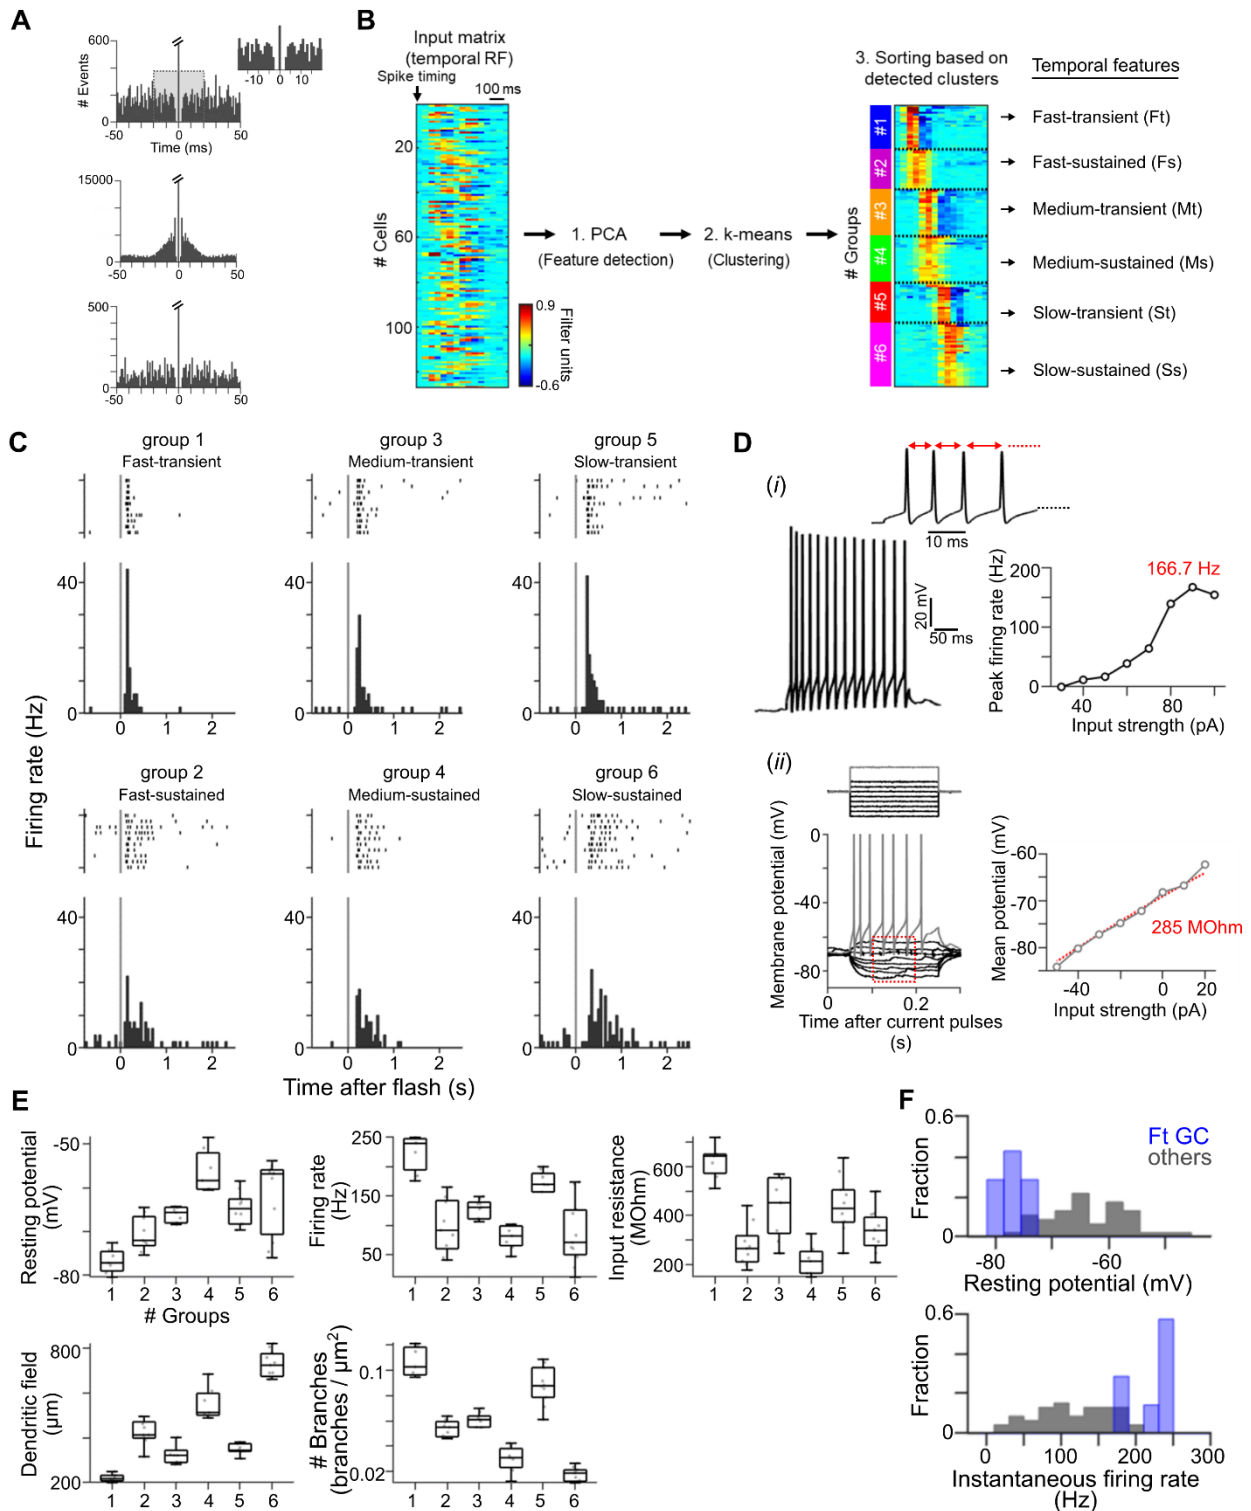

**Supplementary Figures S1. Physiological and morphological classification of goldfish retinal ganglion cells.** (A) Auto-correlograms of spike trains from isolated three units. Inset, a magnification in the range of -20 to +20 ms time delays (gray in top). We used units which showed the refractory

period of spikes for further analysis. **(B)** GC group classification based on the temporal profile of the receptive field (temporal RF). The temporal RF of each GC was estimated from the multi-electrode recordings, and input matrix was created (Left, heat map). Then, using principal component analysis (PCA) and k-means clustering, GCs were sorted into 6 groups (Right, heat map). **(C)** Examples of light-evoked responses in each GC group. Black dots, raster plots of 10 trials. Black bars, peri-stimulus time histograms (50 ms bin width). Gray line, onset of the light stimulus (duration, 1 s; contrast, 100 %). **(D)** Definition of the instantaneous firing rate (*i*) and the input resistance (*ii*). Inter-spike interval of the firing evoked by current pulses (−50 to 100 pA, 10 pA increment) was measured (red arrows), and an inverse of its minimum value was defined as the peak firing rate (*i*). The input resistance was calculated as a slope of the current-voltage function below subthreshold membrane potentials (*ii*). **(E)** Summaries for five features: the resting membrane potential, the peak firing rate, the input resistance, the length of dendritic field, and the branch number of dendrites. These features were used for a hierarchical clustering (Figure 1). 7 group1 (Ft), 8 group2 (Fs), 7 group3 (Mt), 9 group4 (Ms), 9 group5 (St), 12 group6 (Ss) GCs. **(F)** Fraction of the resting potential (upper) and instantaneous firing rate (lower) distributions for Ft GCs (blue, 7 cells from group1) and other GCs (gray, 45 cells). Ft GCs were characterized by a more negative resting membrane potential and a higher instantaneous firing rate of responses ( $-76.5 \pm 3.2$  mV,  $222.9 \pm 90.7$  Hz, 7 Ft GCs) than other GCs ( $-64.5 \pm 7.4$  mV,  $125.3 \pm 67.3$  Hz, 45 other GCs).

## 1.2 Supplementary Figures

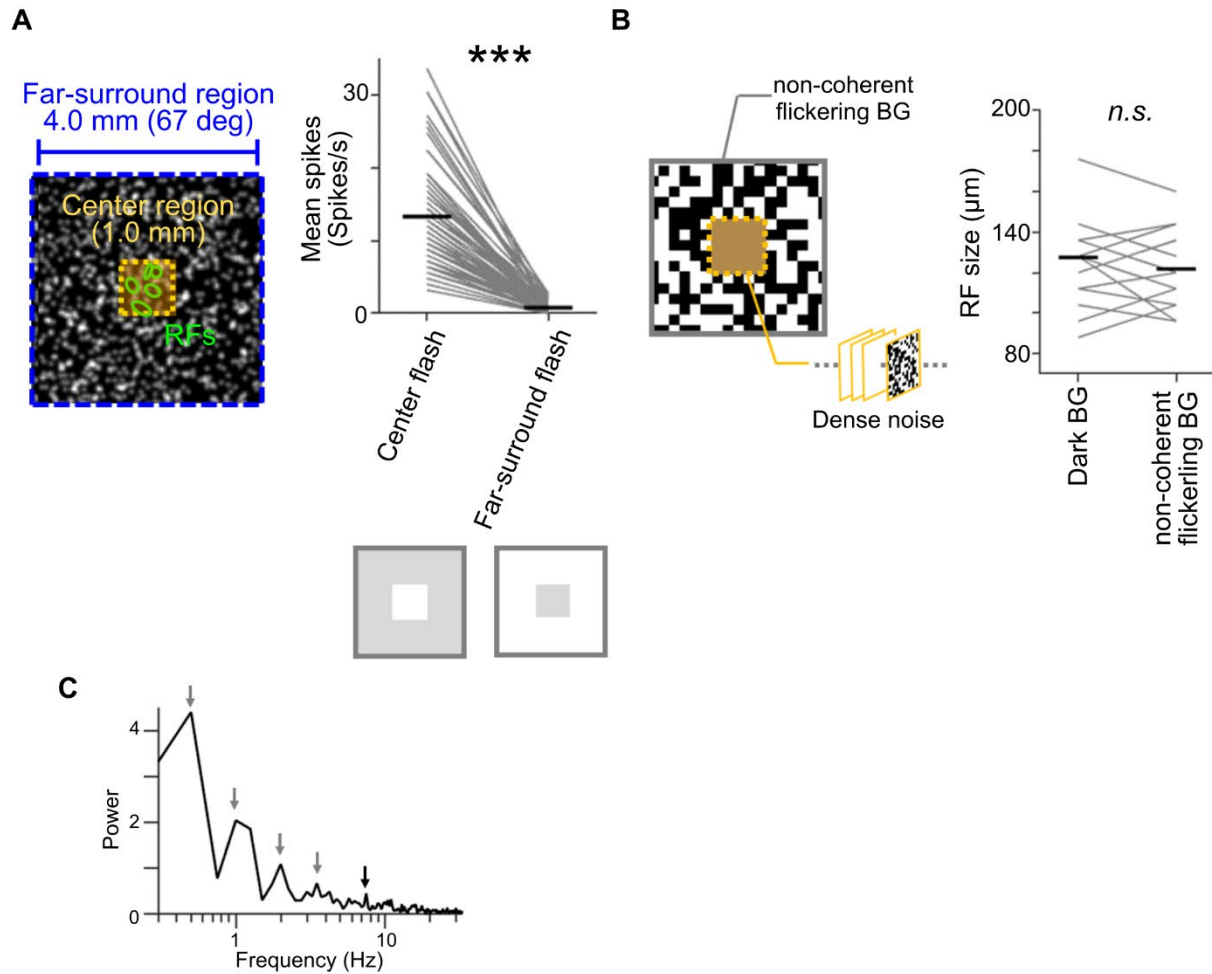

**Supplementary Figures S2. Stimulation at the far-surround region.** (A) Configuration of the jittered global background (Left). GCs on the multi-electrode array responded to a center flash but not to a far-surround flash (Right). 72 GCs, 5 retinas. \*\*\*,  $p < .001$ , paired  $t$ -test. (B) Effects of the non-coherent flickering BG on the RF of Ft GCs. The RF was estimated by the dense noise stimulus at the center region while a randomly flickering checkerboard BG was presented on the far-surround region (Left). The RF size under the non-coherent flickering BG condition was not significantly different from that under the Dark BG condition (Right). 17 Ft GCs, 3 retinas. *n.s.*, paired  $t$ -test. (C) Fast Fourier Transform to estimate the frequency components of the jitter motion trajectory (Figure 2B). Arrows, subpeaks shown in the spectrum.

### 1.3 Supplementary Figures

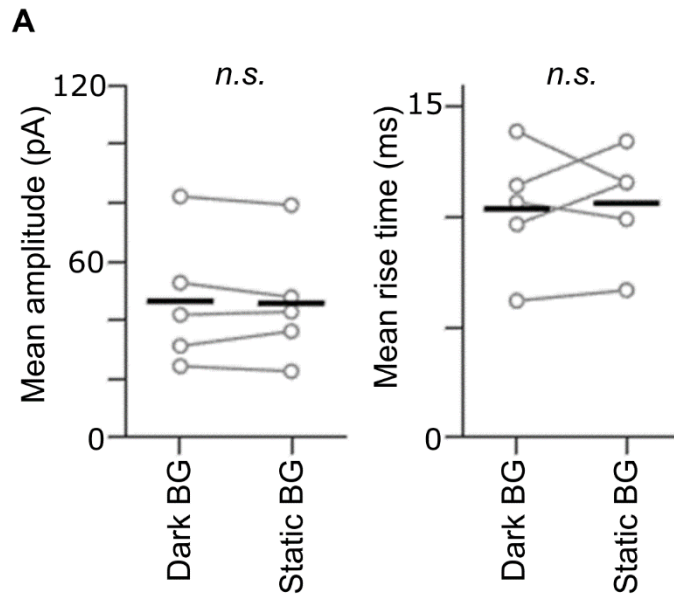

**Supplementary Figures S3. EPSCs evoked by dense noise stimulation under the static BG condition.** (A) Mean amplitude (Left) and rise time (Right) of EPSCs recorded from whole-cell voltage-clamped Ft GCs. Holding potential was  $-60$  mV. Properties of EPSCs evoked under the Static BG condition was not significantly different from those under the Dark BG condition. 5 Ft GCs, 5 retinas. *n.s.*, paired *t*-test.
